# Supplementary material for: Cognitive functioning and psychosomatic syndromes in a subjective tinnitus sample
Source: PubMed Central journal article supplement (PMC10773809; doi:10.3389/fpsyg.2023.1256291), 2023-12-20
Supplement: Table_1.pdf [file Table_1.pdf]

## *Supplementary Material*

### 1 Supplementary Data

**Table 1.** Correlation coefficients between predictors of the regression model

|                                                   | BDI  | DPCR_0_1 | IRRITABILITY | SOMATIZATION | AIB  | MMSE  | FAB   | TINNITUS DURATION | STAI_Y1 | STAI_Y2 | THI  |
|---------------------------------------------------|------|----------|--------------|--------------|------|-------|-------|-------------------|---------|---------|------|
| <b>STAI_Y1</b>                                    |      |          |              |              |      |       |       |                   |         |         |      |
| Pearson correlation                               | .513 | .223     | .081         | .141         | .080 | -.350 | .127  | .005              |         |         | .322 |
| Sig. (2-tailed) with Benjamini-Hocberg correction | .002 |          | .536         | .283         | .543 | .008  | .335  | .972              |         |         | .026 |
|                                                   |      | .086     |              |              |      |       |       |                   |         |         |      |
| N                                                 | 60   | 60       | 60           | 60           | 60   | 60    | 60    | 60                | 60      |         | 59   |
| <b>STAI_Y2</b>                                    |      |          |              |              |      |       |       |                   |         |         |      |
| Pearson correlation                               | .686 | .168     | .084         | .214         | .064 | -.361 | -.103 | .036              |         |         | .500 |
| Sig. (2-tailed) with Benjamini-Hocberg correction |      | .402     |              |              | .718 | .02   | .692  | .783              |         |         | .000 |
|                                                   | .008 |          | .696         | .269         |      |       |       |                   |         |         |      |
| N                                                 | 60   | 60       | 60           | 60           | 60   | 60    | 60    | 60                | 60      |         | 59   |
| <b>BDI</b>                                        |      |          |              |              |      |       |       |                   |         |         |      |
| Pearson correlation                               |      | .334     | .207         | .305         | .105 | -.261 | -.132 | -.081             | .513    | .686    | .467 |
| Sig. (2-tailed) with Benjamini-Hocberg correction |      |          | .163         | .038         | .475 | .075  | .401  | .537              | .000    |         | .000 |
|                                                   |      | .027     |              |              |      |       |       |                   |         | .000    |      |
| N                                                 |      | 61       | 61           | 61           | 61   | 61    | 61    | 61                | 60      | 60      | 60   |
| <b>DPCR_0_1</b>                                   |      |          |              |              |      |       |       |                   |         |         |      |
| Pearson correlation                               | .334 |          | .348         | .348         | .609 | -.023 | .118  | .008              | .223    | .168    | .346 |
| Sig. (2-tailed) with Benjamini-Hocberg correction |      |          | .018         | .018         | .000 | .949  | .464  | .949              |         | .301    | .02  |
|                                                   | .025 |          |              |              |      |       |       |                   | .154    |         |      |

Supplementary Material

|                                                    | N  | 61    | 62    | 62    | 62   | 62   | 62    | 62    | 60   | 60    | 61    |       |       |       |
|----------------------------------------------------|----|-------|-------|-------|------|------|-------|-------|------|-------|-------|-------|-------|-------|
| <b>IRRITABILITY</b>                                |    |       |       |       |      |      |       |       |      |       |       |       |       |       |
| Pearson correlation                                |    | .207  | .348  |       | .073 | .128 | -.137 | -.149 |      | .157  | .081  | .084  | .221  |       |
| Sig. (2-tailed) with Benjamini-Hochberg correction |    | .327  | .054  |       | .571 | .320 | .411  | .411  |      | .411  | .571  |       | .145  |       |
|                                                    |    |       |       |       |      |      |       |       |      |       |       | .327  |       |       |
| N                                                  | 61 | 62    |       | 62    | 62   | 62   | 62    |       | 62   | 60    | 60    |       | 61    |       |
| <b>SOMATIZATION</b>                                |    |       |       |       |      |      |       |       |      |       |       |       |       |       |
| Pearson correlation                                |    | .305  | .348  | .073  |      | .055 | .032  | .107  |      | -.085 | .141  |       | .214  |       |
| Sig. (2-tailed) with Benjamini-Hochberg correction |    | .076  | .054  | .734  |      | .757 | .802  | .732  |      | .734  | .636  |       |       |       |
|                                                    |    |       |       |       |      |      |       |       |      |       |       |       | .303  |       |
| N                                                  | 61 | 62    | 62    |       | 62   | 62   | 62    |       | 62   | 60    | 60    |       |       |       |
| <b>AIB</b>                                         |    |       |       |       |      |      |       |       |      |       |       |       |       |       |
| Pearson correlation                                |    | .105  | .609  | .128  |      | .055 |       | .005  | .051 |       | .104  | .080  | .064  | -.096 |
| Sig. (2-tailed) with Benjamini-Hochberg correction |    | .696  | .000  | .696  |      | .696 |       | .696  | .696 |       | .696  | .696  | .696  | .512  |
| N                                                  | 61 | 62    | 62    |       | 62   |      | 62    | 62    |      | 62    | 60    | 60    |       | 61    |
| <b>MMSE</b>                                        |    |       |       |       |      |      |       |       |      |       |       |       |       |       |
| Pearson correlation                                |    | -.261 | -.023 | -.137 |      | .032 | .005  |       | .261 |       | -.163 | -.350 | -.361 | -.321 |
| Sig. (2-tailed) with Benjamini-Hochberg correction |    | .090  | .858  | .287  |      | .858 | .858  |       | .090 |       | .370  | .027  | .027  | .026  |
| N                                                  | 61 | 62    | 62    |       | 62   | 62   |       | 62    |      | 62    | 60    | 60    |       | 61    |
| <b>FAB</b>                                         |    |       |       |       |      |      |       |       |      |       |       |       |       |       |
| Pearson correlation                                |    | -.132 | .118  | -.149 |      | .107 | .051  | .261  |      | .118  | .127  | -.103 |       | -.152 |
| Sig. (2-tailed) with Benjamini-                    |    | .487  | .487  | .487  |      | .487 | .691  | .487  |      | .487  | .487  | .487  |       | .345  |

| Hocberg correction                                | N | 61    | 62   | 62   | 62    | 62   | 62    | 62   | 62 | 60   | 60   | 61   |
|---------------------------------------------------|---|-------|------|------|-------|------|-------|------|----|------|------|------|
| <b>TINNITUS DURATIO</b>                           |   |       |      |      |       |      |       |      |    |      |      |      |
| N                                                 |   |       |      |      |       |      |       |      |    |      |      |      |
| Pearson correlation                               |   | -.081 | .008 | .157 | -.085 | .104 | -.163 | .118 |    | .005 | .036 | .081 |
| Sig. (2-tailed) with Benjamini-Hocberg correction |   | .805  | .972 | .805 | .805  | .805 | .805  | .805 |    | .972 | .972 | .537 |
| N                                                 |   | 61    | 62   | 62   | 62    | 62   | 62    | 62   |    | 60   | 60   | 61   |

**Acronyms:** BDI=Beck Depression Inventory; DCPR= Diagnostic Criteria for Psychosomatic Research; DPCR\_0=Absence of Diagnostic Criteria for Psychosomatic Research; DPCR\_1= At least one disorder of Diagnostic Criteria for Psychosomatic Research. IRRITABILITY= Irritability Cluster of Diagnostic Criteria for Psychosomatic Research; SOMATIZATION= Somatization Cluster of Diagnostic Criteria for Psychosomatic Research; AIB= Abnormal Illness Behaviour; MMSE= Mini-Mental State Examination; FAB= Frontal Assessment Battery; STAI Y1= State-Trait Anxiety Inventory Y1; STAI Y2= State-Trait Anxiety Inventory Y2; THI= Tinnitus Handicap Inventory.
